# Supplementary material for: Early sexual activity lowers the incidence of intracranial aneurysm: a Mendelian randomization investigation
Source: Frontiers journal article supplement (doi:10.3389/fneur.2024.1349137), 2024-06-04

# MR Test

- Inverse variance weighted
- MR Egger
- Simple mode
- Weighted median
- Weighted mode

SNP effect on Age first had sexual intercourse || id:ukb-b-6591

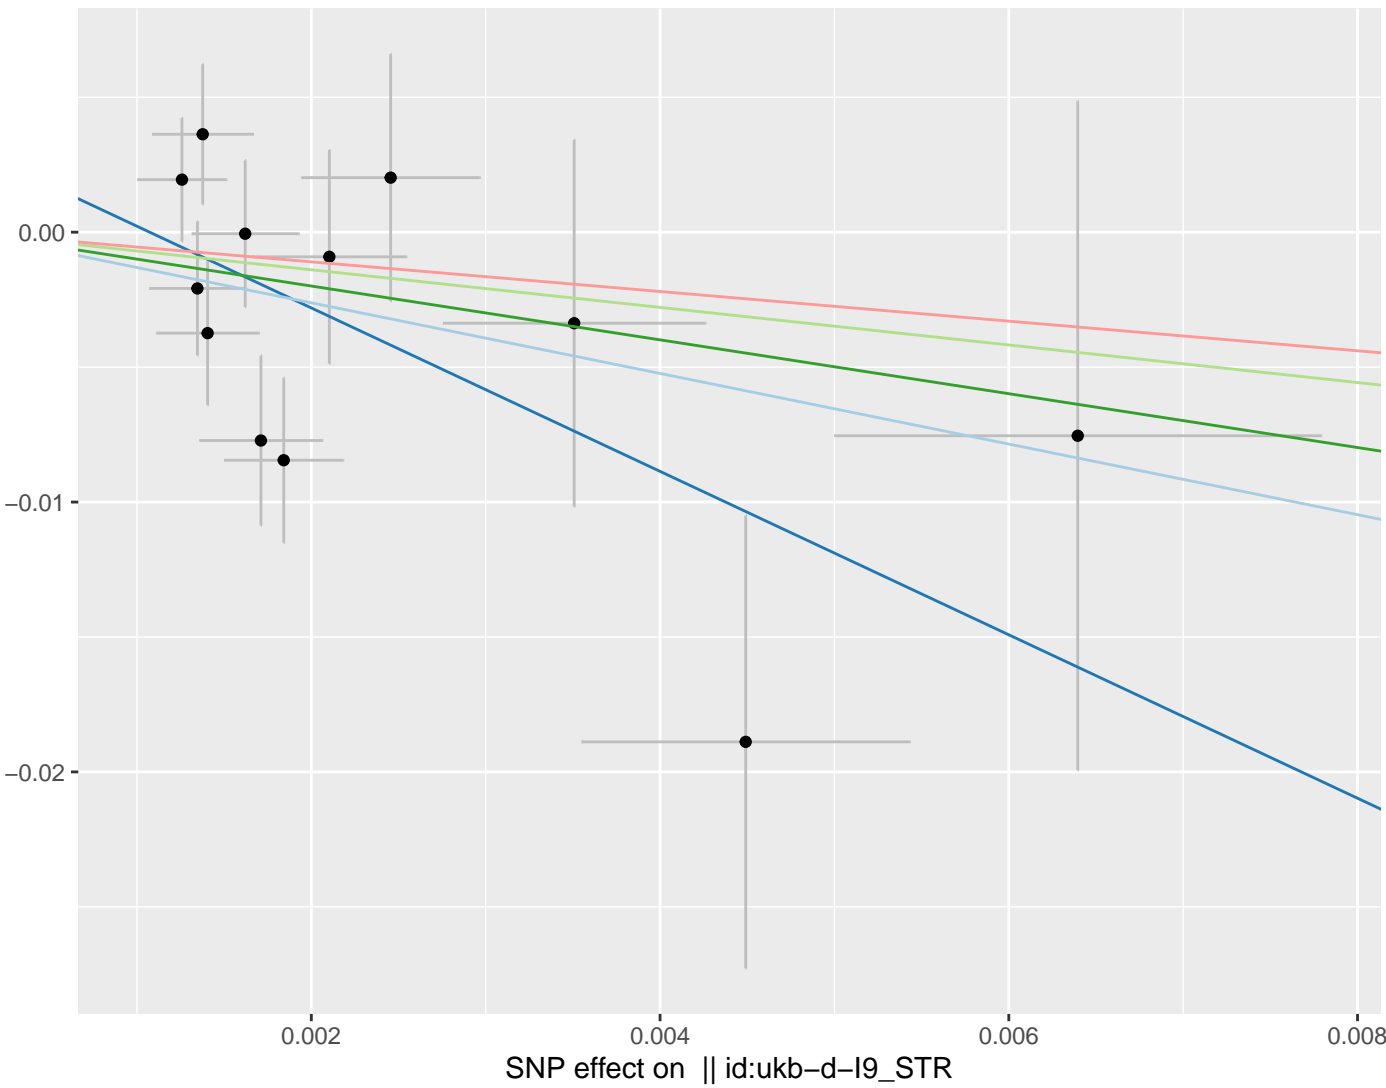

Supplement: Data_Sheet_4.PDF [file Data_Sheet_4.PDF]
