# Supplementary material for: Early sexual activity lowers the incidence of intracranial aneurysm: a Mendelian randomization investigation
Source: Frontiers journal article supplement (doi:10.3389/fneur.2024.1349137), 2024-06-04
Supplement: Data_Sheet_7.PDF [file Data_Sheet_7.PDF]

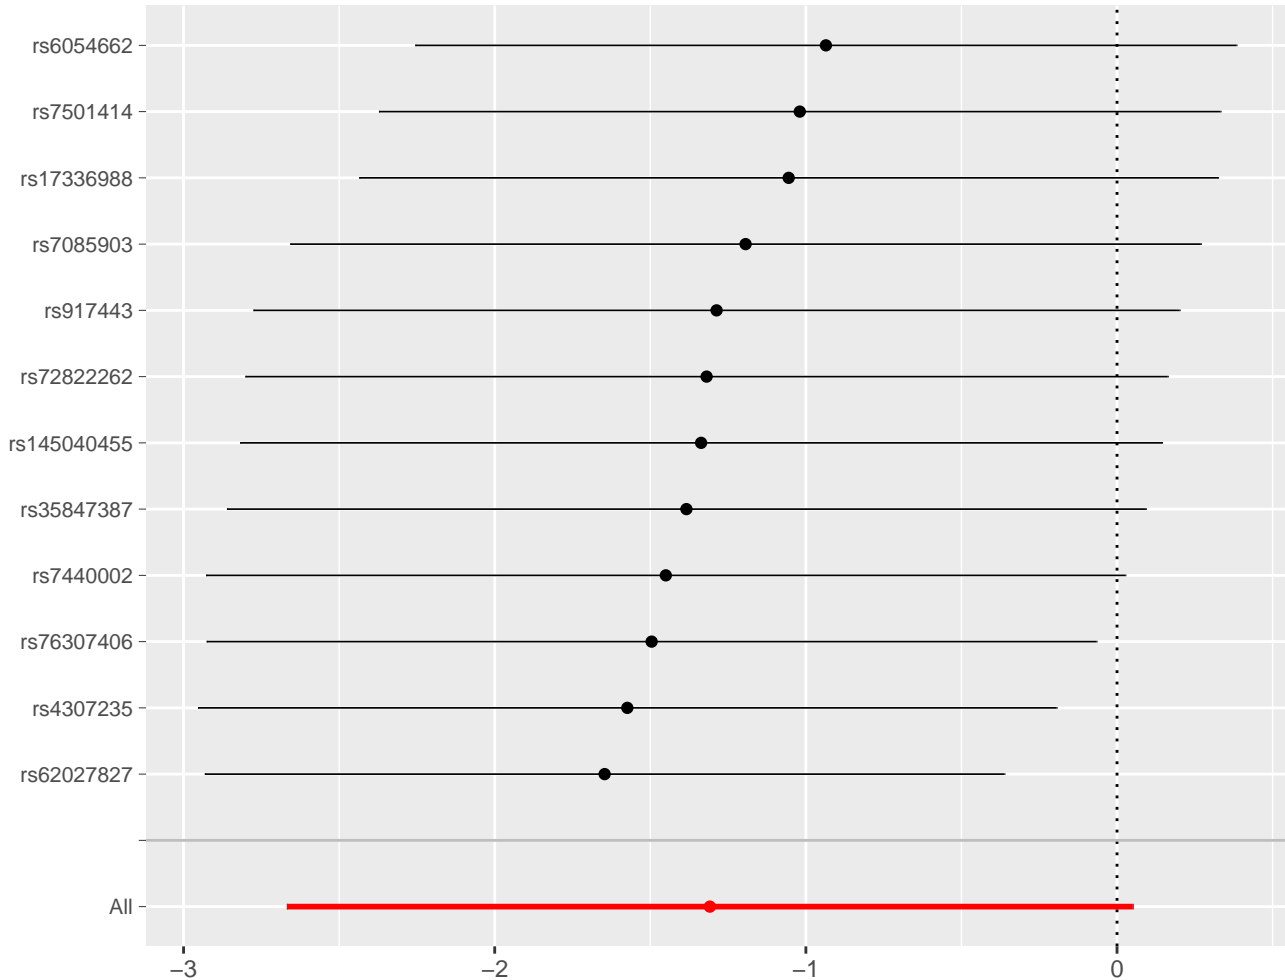

MR leave-one-out sensitivity analysis for  
' || id:ukb-d-l9\_STR' on 'Age first had sexual intercourse || id:ukb-b-6591'
